# Supplementary material
Source: publisher site journal article supplement (http://static.cambridge.org/content/id/urn:cambridge.org:id:article:S0266462315000586/resource/name/SupplementaryTable1.docx)
Supplement: Supplementary file 1 [file SupplementaryTable1.docx]

| **Supplementary Table 1: User comments on Control and Test devices** | | |  |  | | |  |  | | | |  | |
| --- | --- | --- | --- | --- | --- | --- | --- | --- | --- | --- | --- | --- | --- |
| **Test device positive** | **n=** | **Test device negative** | | | **n=** | **Control device positive** | | | **n=** | **Control device negative** | **n=** | |
| **Registered nurse comments** | | | | | | | | | | |  | |
| More accurate | 17 | Hard to turn | | | 9 | Easier to use | | | 14 | Less accurate | 8 | |
| Easier to use | 6 | Numbers on dial don't correlate with flow | | | 5 | Can be used with one hand | | | 8 | Damages tube | 4 | |
| Index clicks helpful | 3 | Requires two hands | | | 5 | Simple | | | 4 | Not Accurate | 3 | |
| Less likely to give free flow | 3 | Sensitive | | | 2 | Familiar | | | 3 | Too sensitive | 1 | |
| Bigger so easier to use | 2 | Hard to set up | | | 2 | More accurate | | | 1 | Slower to use | 1 | |
| Avoids needing infusion pump if not available | 1 | Iv pump better | | | 2 |  | | |  | Iv pump better | 1 | |
| Safer | 1 | Presumable more expensive | | | 1 |  | | |  | Unreliable | 1 | |
| Looks good | 1 | Time consuming | | | 1 |  | | |  |  |  | |
|  |  | Too big | | | 1 |  | | |  |  |  | |
|  |  | Unfamiliar | | | 1 |  | | |  |  |  | |
| **Student nurse comments** | | | | | | | | | | |  | |
| More accurate | 14 | Hard to turn | | | 21 | Easier to use | | | 18 | Unreliable | 6 | |
| Less likely to cause free flow | 9 | Requires two hands | | | 6 | Can use with one hand | | | 8 | Hard to control | 6 | |
| Easier to use | 5 | Too big | | | 4 | Simple | | | 2 | Less accurate | 3 | |
| Quicker | 4 | Sensitive | | | 3 | Quicker | | | 2 | Sensitive | 3 | |
| Safer | 2 | Painful | | | 1 | Less sensitive | | | 1 | Don’t know direction to move dial | 1 | |
| Numbers indicate direction to move dial | 2 |  | | |  | More accurate | | | 1 | Fragile | 1 | |
| Indexing is helpful | 3 |  | | |  | More reliable | | | 1 |  |  | |
| Larger dial | 1 |  | | |  |  | | |  |  |  | |
